# Supplementary material
Source: PubMed Central journal article supplement (PMC5016240)
Supplement: NIHMS801602-supplement-Supplemental_Figures_and_Tables.pdf [file NIHMS801602-supplement-Supplemental_Figures_and_Tables.pdf]

# **Vascular ADAM17 as a Novel Therapeutic Target in Mediating Cardiovascular Hypertrophy and Perivascular Fibrosis Induced by Angiotensin II**

Takehiko Takayanagi\*, Steven J. Forrester\*, Tatsuo Kawai, Takashi Obama, Toshiyuki Tsuji, Katherine J. Elliott, Elisa Nuti, Armando Rossello, Hang Fai Kwok, Rosario Scalia, Victor Rizzo and Satoru Eguchi

Cardiovascular Research Center, Lewis Katz School of Medicine at Temple University, Philadelphia PA (T.T., S.J.F., T.K., T.O., T.T., Y.F., K.J.E., R.S., V.R., S.E.), Department of Pharmacy, University of Pisa, Pisa, Italy (E.N., A.R.), and Faculty of Health Sciences, University of Macau, Macau, China (HF.K.)

\* These authors contributed equally to this work.

**Short title:** Vascular ADAM17 mediates organ damage by AngII

**Corresponding author:** Satoru Eguchi MD PhD FAHA, Lewis Katz School of Medicine at Temple University, 3500 N. Broad Street, Philadelphia, Pennsylvania 19140. Tel 215-707-8378, Fax 215-707-5737, e-mail: [seguchi@temple.edu](mailto:seguchi@temple.edu)

## Supplementary Tables S1

### S1A. M-mode echocardiography at 2 weeks after AngII infusion

|            | A17 <sup>ff</sup> smCre <sup>-/-</sup> |              | A17 <sup>ff</sup> smCre <sup>+/-</sup> |              |
|------------|----------------------------------------|--------------|----------------------------------------|--------------|
|            | saline                                 | AngII        | saline                                 | AngII        |
| IVSd (mm)  | 0.620±0.050                            | 0.781±0.097* | 0.590±0.049                            | 0.581±0.040† |
| LVIDd (mm) | 3.72±0.15                              | 3.02±0.12*   | 3.75±0.07                              | 3.51±0.29    |
| LVPWd (mm) | 0.750±0.017                            | 0.963±0.049* | 0.638±0.060                            | 0.755±0.070† |
| LVIDs (mm) | 2.95±0.20                              | 2.09±0.15*   | 2.88±0.11                              | 2.70±0.21†   |
| FS (%)     | 29.4±4.1                               | 29.5±1.4     | 33.7±1.9                               | 34.4±5.9     |

Mean±SD (n=8), p<0.001 compared with saline\* or AngII† infusion.

IVSd: interventricular septum thickness in diastole; LVIDd: LV internal diameter in diastole; LVPWd: LV posterior wall thickness in diastole; LVIDs: LV internal diameter in systole; FS: fractional shortening.

### S1B. Effects of VSMCADAM17 deletion on characteristics of mice infused with AngII

| Parameters     | A17 <sup>ff</sup> Cre <sup>-/-</sup> saline | A17 <sup>ff</sup> Cre <sup>-/-</sup> AngII | A17 <sup>ff</sup> Cre <sup>+/-</sup> saline | A17 <sup>ff</sup> Cre <sup>+/-</sup> AngII |
|----------------|---------------------------------------------|--------------------------------------------|---------------------------------------------|--------------------------------------------|
| BW (g)         | 25.4±4.2                                    | 19.9±3.5                                   | 24.5±2.4                                    | 21.8±3.7                                   |
| SBP/DBP (mmHg) | 121±5/88±13                                 | 185±19*/142±19*                            | 117±11/96±10                                | 182±26*/131±18*                            |
| HR (beats/min) | 496±159                                     | 570±100                                    | 463±146                                     | 585±58                                     |

Mean±SD (n=8), \*p<0.001 compared with saline infusion. BW: body weight; SBP: systolic blood pressure; DBP: diastolic blood pressure; HR: heart rate. No significance was detected among the parameters between Cre<sup>+/-</sup> and Cre<sup>-/-</sup> animals regardless of the treatment.

## Supplementary Table S2

### S2A. M-mode echocardiography at 2 weeks

|            | saline      | AngII+IgG2   | AnGII+A9B8   |
|------------|-------------|--------------|--------------|
| IVSd (mm)  | 0.679±0.020 | 0.902±0.029* | 0.774±0.025† |
| LVIDd (mm) | 3.84±0.07   | 3.58±0.10*   | 3.65±0.12    |
| LVPWd (mm) | 0.707±0.020 | 0.847±0.020* | 0.798±0.036† |
| LVIDs (mm) | 3.11±0.07   | 2.634±0.08*  | 2.67±0.15    |
| FS (%)     | 28.7±0.7    | 30.2±0.7     | 29.7±1.0     |

Mean±SD (n=8), p<0.001 compared with saline\* or AngII† infusion.

IVSd: interventricular septum thickness in diastole; LVIDd: LV internal diameter in diastole; LVPWd: LV posterior wall thickness in diastole;

LVIDs: LV internal diameter in systole; FS: fractional shortening.

### S2B. Effects of A9B8 on characteristics of mice infused with AngII

| Parameters     | saline       | AngII+IgG2     | AngII+A9B8    |
|----------------|--------------|----------------|---------------|
| BW (g)         | 23.3±2.2     | 25.0±2.0       | 24.6±2.1      |
| SBP/DBP (mmHg) | 119±15/84±12 | 172±9*/137±17* | 170±7*/141±6* |
| HR (beats/min) | 634±85       | 586±87         | 583±90        |

Mean±SD (n=6), \*p<0.001 compared with saline infusion. BW: body weight; SBP: systolic blood pressure; DBP: diastolic blood pressure; HR: heart rate.

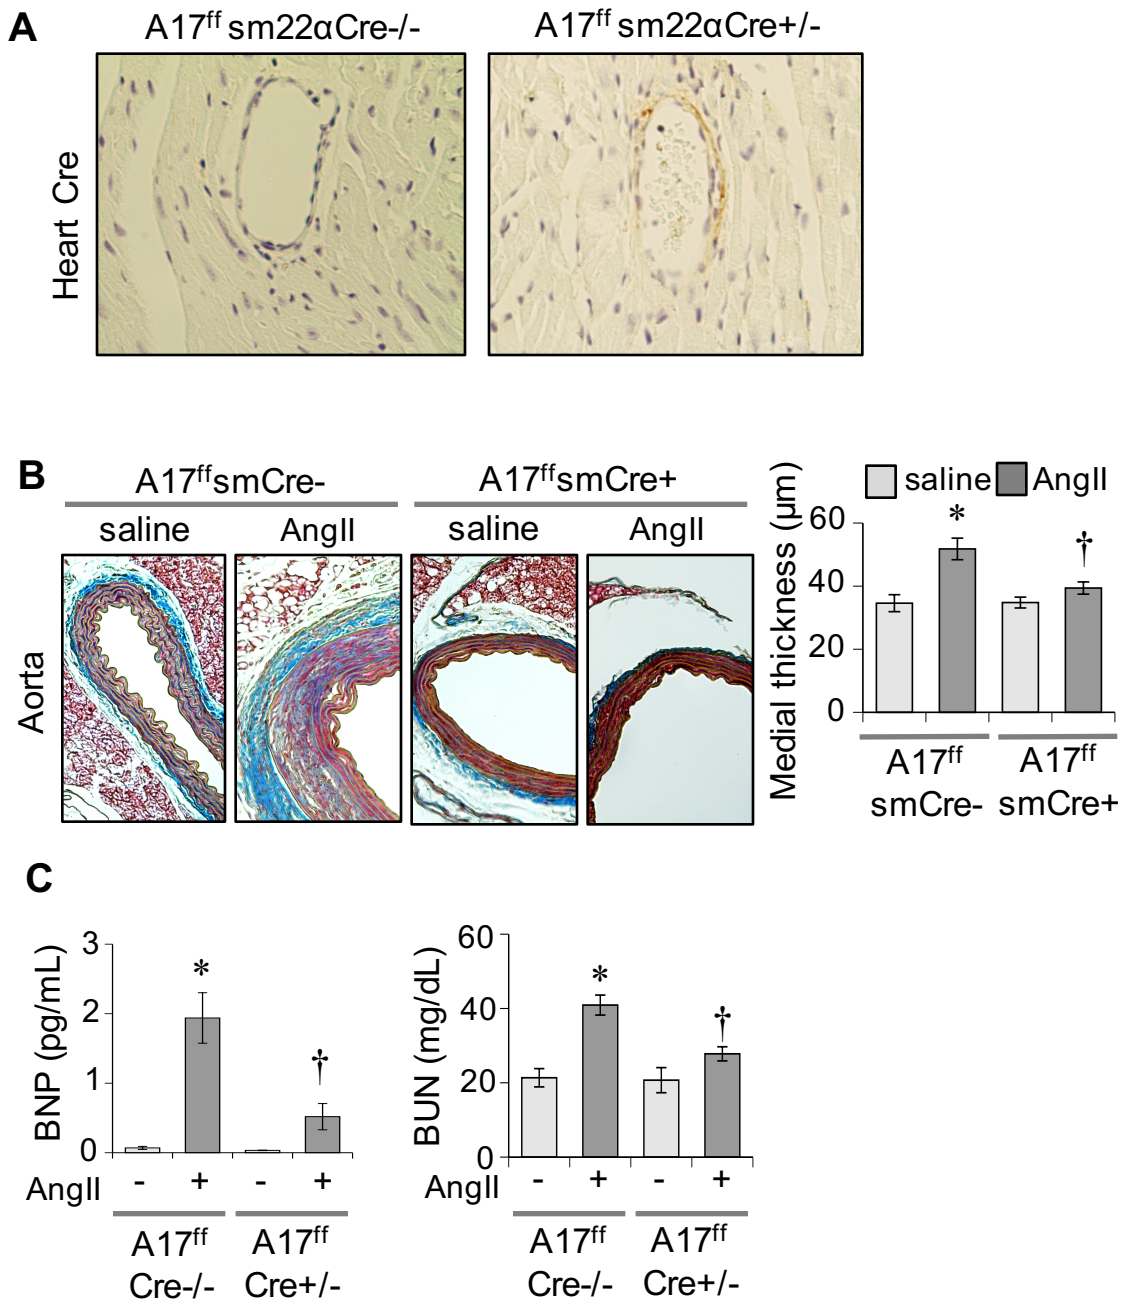

**Supplementary Figure S1. A.** Expression of Cre in VSMC ADAM17 deficient mice. Cre expression was analyzed by immunohistochemistry with anti-Cre antibody. **B.** VSMC ADAM17 deficient mice and control mice were infused with AngII or saline as in Figure 1. Aortas were stained with Masson's trichrome. Representative images are shown. Data are mean  $\pm$  SEM (n=6). **C.** Plasma BNP concentration. Plasma BUN concentration. Mean  $\pm$  SEM (n=6). \*p<0.05 compared with saline control. †p<0.05 compared with AngII control.

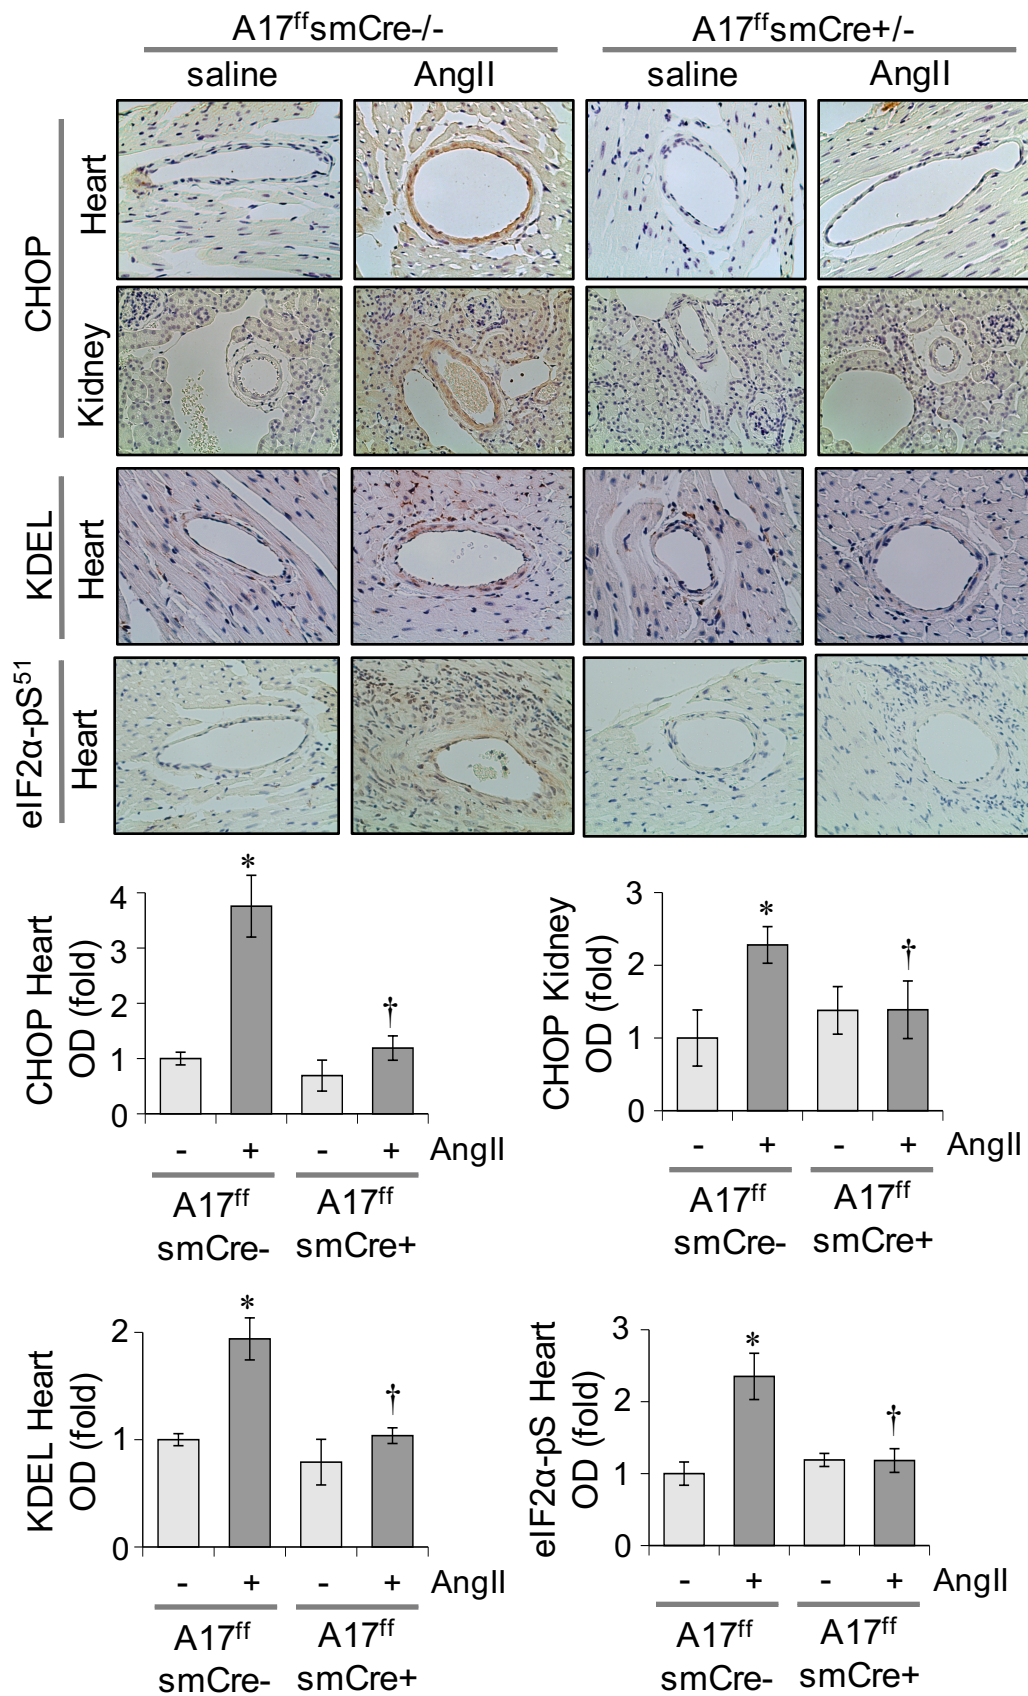

**Supplementary Figure S2. a.** Suppression of vascular ER stress in VSMC ADAM17 deficient mice. VSMC ADAM17 deficient mice and control mice were infused with AngII or saline as in Fig 1. Tissues were immuno-stained with the antibodies indicated. Representative images are presented (n=4). Data are mean±SEM (n=4). \*p<0.05 compared with saline control. †p<0.05 compared with AngII control.

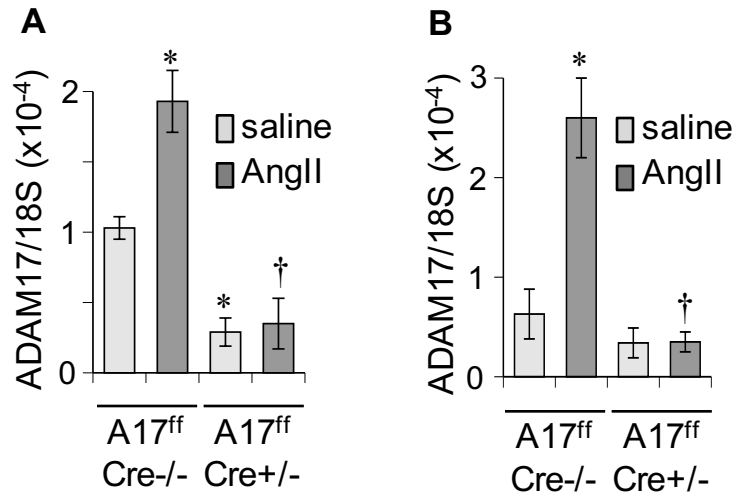

**Supplementary Figure S3.** The aorta (**A**) and heart (**B**) samples were evaluated for ADAM17 mRNA expression by qPCR. Mean  $\pm$  SEM (n=6). \*p<0.05 compared with saline control. †p<0.05 compared with AngII control.

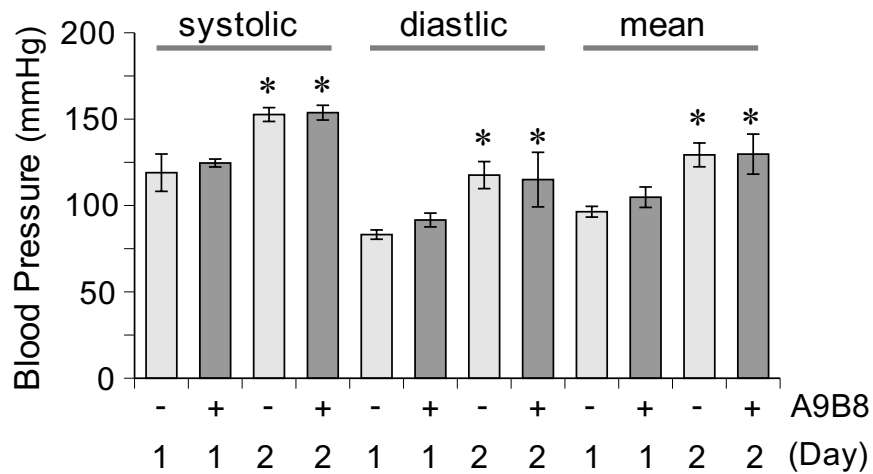

**Supplementary Figure S4.** Effects of ADAM17 inhibitory antibody, A9B8, on hypertension development induced by AngII. **A:** C57Bl/6 mice were infused with AngII from Day 0 with or without treatment of A9B8 on Day 1. Arterial pressure was evaluated by telemetry on Day 1 and Day 2 (Mean±SEM, n=3). Significant blood pressure elevation in response to AngII infusion was observed at Day 2 compared with Day 1 regardless of the antibody treatment. \*p<0.05 compared with corresponding Day1 values.

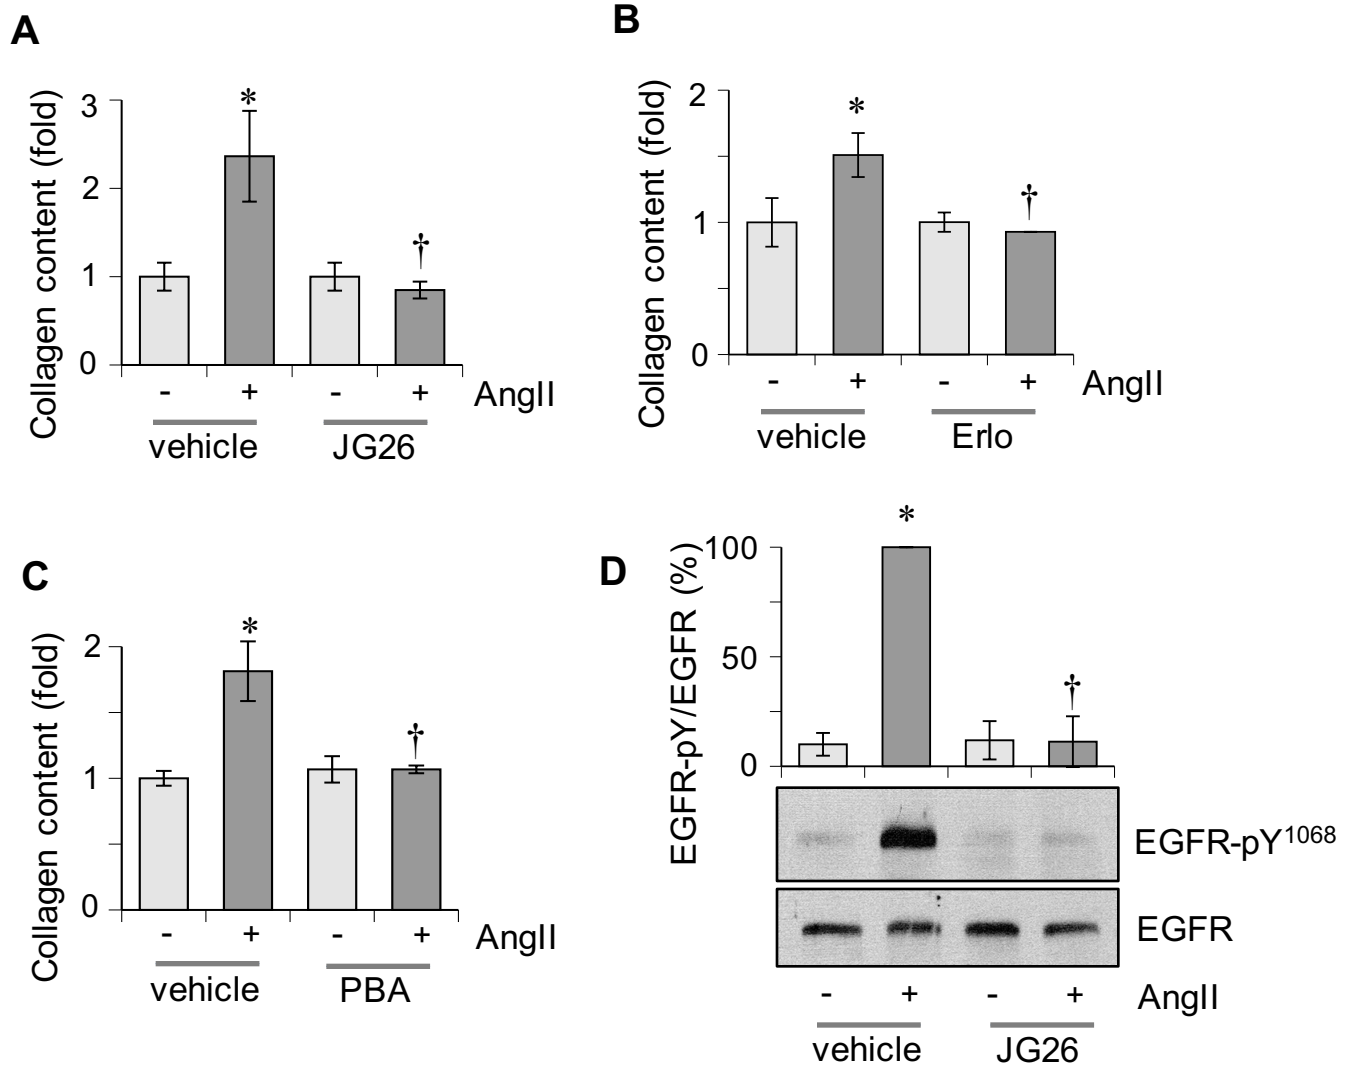

**Supplementary Figure S5. A:** Rat aortic VSMCs pretreated with ADAM17 inhibitor JG26 (1  $\mu$ mol/L) or vehicle (DMSO final concentration 0.1%) for 30 min were stimulated with 100 nmol/L AngII for 48 hours and extracellular collagen accumulation was quantified. Mean $\pm$ SD (n=4). **B:** VSMCs pretreated with EGFR inhibitor erlotinib (Ero) or vehicle (DMSO final concentration 0.1%) for 30 min were stimulated with 100 nmol/L AngII for 48 hours and extracellular collagen accumulation was quantified. Mean $\pm$ SD (n=4). **C:** VSMCs pretreated with or without PBA (10 mmol/L in DMEM) were stimulated with 100 nmol/L AngII for 48 h and extracellular collagen accumulation was quantified. Mean $\pm$ SD (n=4). **D:** VSMCs pretreated with JG26 (1  $\mu$ mol/L) or vehicle (DMSO final concentration 0.1%) for 30 min were stimulated with 100 nmol/L AngII for 2 min and immunoblottings were performed with antibodies as indicated. Mean $\pm$ SD (n=4). \*p<0.05 compared with vehicle control. †p<0.05 compared with AngII control.
